# Supplementary material for: Multimeric ACE2-IgM fusions as broadly active antivirals that potently neutralize SARS-CoV-2 variants
Source: Springer Nature journal article supplement (doi:10.1038/s42003-022-04193-z), 2022-11-12
Supplement: MOESM2 [file 42003_2022_4193_MOESM2_ESM.pdf › 42003_2022_4193_MOESM2_ESM.pdf]

## **Description of Additional Supplementary Files**

**File name:** Supplementary Data 1

**Description:** The source data behind the graphs in the paper
